# Supplementary material
Source: PubMed Central journal article supplement (PMC4758874)
Supplement: NIHMS751764-supplement-1.pdf [file NIHMS751764-supplement-1.pdf]

## SUPPLEMENTAL METHODS

**Strain recovery from mouse stomachs for culture and *H. pylori*-specific PCR.** *H. pylori* PMSS1 was routinely grown on Columbia blood agar (CBA) plates at 37°C in a microaerobic atmosphere prior to mouse infection. Following sacrifice, for each mouse (including controls), a longitudinal quarter of the stomach was collected, weighed and grinded in 250 µl PBS. Different dilutions of the suspension were plated on CBA (with added amphotericin B, vancomycin, and polymyxin B). CBA-plates were incubated for up to 17 days at 37°C under microaerobic atmosphere and *H. pylori* CFU (colony forming units) were determined. 100 µl of the grinded stomach suspension was used for chromosomal DNA isolation and *glmM* PCR was performed to verify *H. pylori* presence (Jenks et al., 1998; Lu et al., 1999). The *glmM* PCR also was applied for *H. pylori* detection in fecal samples; experiments involving spiking of fecal pellets with *H. pylori* revealed a threshold for detection of  $5 \times 10^5$  *H. pylori* per fecal pellet (or  $10^4$  *H. pylori*/mg of stool).

**Measurement of *H. pylori*-specific antibodies and CagA antibodies in mice by Enzyme-linked immunosorbent assay.** ELISA plates were coated with whole cell *H. pylori* PMSS1 protein, as described (Pohl et al., 2012). Plates were coated overnight at 4°C and then blocked for 2 h with 1x PBS containing 0.05% Tween-20, 0.1 mg/ml thimerosal, and 0.1% gelatin. Serum samples were diluted 1:600 and plates were incubated for 1 h at 37°C. All washing steps were performed with 1x PBS containing 0.05% Tween-20 and 0.1 mg/ml thimerosal. Goat anti-mouse IgG (Fc) or IgM conjugated to horseradish peroxidase (Life Technologies) was used as second antibody for detection of responses. An ELISA to detect anti-CagA IgG in plasma of the mice was performed using a purified recombinant CagA antigen, as described (Blaser et al., 1995). The assay was modified with the use of the goat anti-mouse IgG conjugate, and mouse plasma was diluted 1:100. For the whole cell and the CagA ELISAs, all samples were run in duplicate and optical density ratios (ODRs)

were determined by dividing the OD-value of the sample by the OD-value of a positive control for *H. pylori* or CagA, which were included on each ELISA plate as reference specimens; three to six mice were bled for each time point throughout the experiment.

**Histopathology.** For each mouse, stomach tissue was collected at each sacrifice time point, fixed in neutral-buffered formalin, routinely processed and stained with hemotoxylin and eosin (H&E). Histopathology of stomachs was scored according to the Sidney Classification (Mainguet et al., 1993) for chronic and active inflammation in corpus and antrum. For overall analysis, the sum of active and chronic inflammatory scores for corpus and antrum was compared and expressed as inflammation score.

**Nanostring.** RNA was isolated using the QIAshredder and the miRNeasy Mini Kit (Qiagen, Redwood City CA). Expression levels of 547 transcripts related to immunity were measured by the nCounter GX Mouse Immunology Panel (NanoString, Seattle WA) at 1, 3, and 6 month after challenge for Cohort 1 mice. Gene counts were normalized per manufacturers instructions, and expression levels were visualized on a heat map with hierarchical clustering of samples using the R statistical framework. Significant differences were detected by t-test with p-values adjusted by false-discovery rate; changes in canonical pathways and biological functions were predicted using Ingenuity Pathway Analysis (Qiagen).

**Hormone measurements.** Blood cells and serum were separated through centrifugation (3000 g for 10 min at RT) and the serum frozen at -80°C. Ghrelin, insulin, leptin, and peptide YY were measured using the Millipore Mouse Gut Hormone Panel (Millipore Corp., St. Charles MO) using a Luminex 200 (Millipore) analyzer.

**DNA library preparation, sequencing and sequence analysis.** After DNA isolation and 16s rRNA gene amplification, DNA concentrations of each amplicon were measured using Quant-iT PicoGreen dsDNA reagent (Invitrogen), and pooled at equal

DNA quantities. After samples were pooled in 5 groups of 96 samples each, excess primers were removed with the Qiaquick PCR purification kit (Qiagen). DNA concentration in these sub-pools were quantified with the Qubit high sensitivity dsDNA Assay (Invitrogen), and combined at equal concentration for a pool with unique molecular barcodes. The amplicons were sequenced on the Illumina MiSeq I platform, with 50% PhiX spiked into the amplicon pool to improve the signal from a low diversity library. The sequencing was carried out in three separate reads, (i) 151 base pair forward read, (ii) 12 base pair barcode read, and (iii) 151 base pair reverse read. Only reads that passed the Illumina quality filter were used for downstream analysis. Paired end reads were joined with EA-utils; only reads that were a perfect match were kept. QIIME (Caporaso et al., 2010) was used to demultiplex and quality-filter the samples. Reads were truncated at a stretch of 4 or more low quality bases (phred q score < 20), and only reads  $\geq$  75% of the original length were retained; 1,972,991 sequences were retained after demultiplexing and quality filtering.

Calculation of alpha-diversity (richness, Shannon-index), beta-diversity (UniFrac distances), and generation of relative abundance and PCoA plots were performed using QIIME (Caporaso et al., 2010) and plots were generated by KiNG Kinemage Next Generation version 2.16. Alpha- and beta-diversity were analyzed with even sampling (500, 1,000 and for stomach 3,000) depth by accepting a loss of 4 samples or 25 samples, respectively. Differences of microbial compositions were measured by unweighted UniFrac distances and significance testing was performed using the ADONIS test, with 999 permutations. P-values  $\leq$  0.05 were considered significant. Linear discrimination analysis effect size (LEfSE) (Segata et al., 2011) was used via the Galaxy Browser (Blankenberg et al., 2010; Giardine et al., 2005; Goecks et al., 2010) to detect significant changes in relative abundance of microbial taxa.

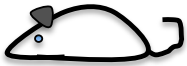

age at infection

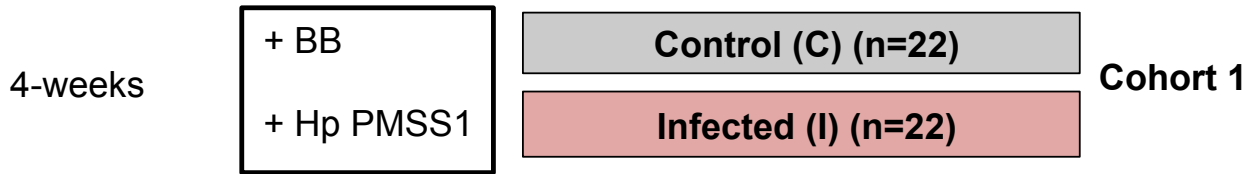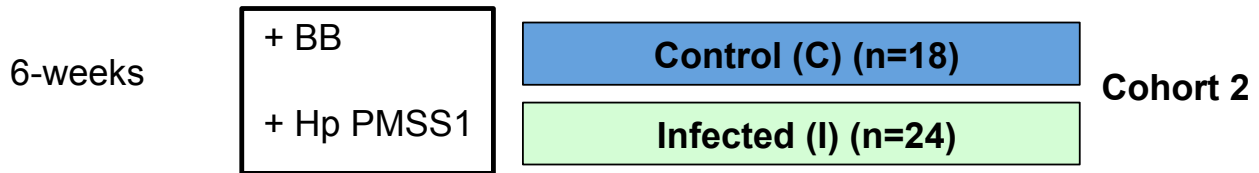

|                            |   |       |       |      |      |      |
|----------------------------|---|-------|-------|------|------|------|
| Infection                  | + |       |       |      |      |      |
| Blood                      | + | +     | +     | +    | +    | +    |
| Feces                      | + | +     | +     | +    | +    | +    |
| Sacrifice                  |   | +     | +     | +    |      | +    |
| Month (post-infection)     | 0 | 1     | 2     | 3    | 4.5  | 6    |
|                            |   | ↑     | ↑     | ↑    | ↑    | ↑    |
| <b>Total Mouse # (I/C)</b> |   | 12/11 | 12/11 | 11/9 | 11/9 | 11/9 |

**Colonization Status (I/C)**

|                 |           |     |     |     |     |
|-----------------|-----------|-----|-----|-----|-----|
| <b>Cohort 1</b> | Mouse #   | 6/6 | 6/6 | 5/5 | 5/5 |
|                 | Culture + | 5/0 | 5/0 | 5/0 | 4/0 |
|                 | PCR +     | 3/0 | 1/0 | 3/0 | 5/0 |
|                 | Overall + | 6/0 | 5/0 | 5/0 | 5/0 |
| <b>Cohort 2</b> | Mouse #   | 6/5 | 6/5 | 6/4 | 6/4 |
|                 | Culture + | 5/0 | 3/0 | 3/0 | 4/0 |
|                 | PCR +     | 6/0 | 3/0 | 6/0 | 5/0 |
|                 | Overall + | 6/0 | 5/0 | 6/0 | 6/0 |



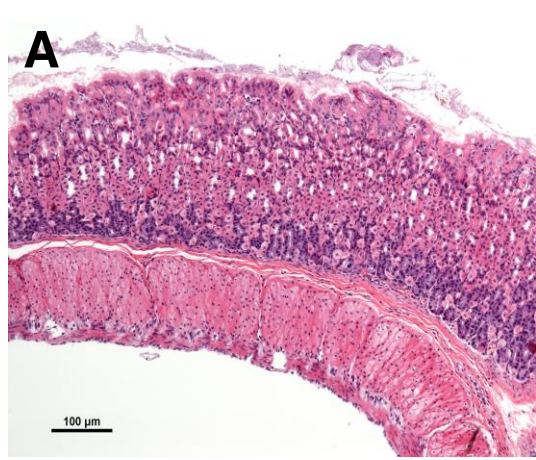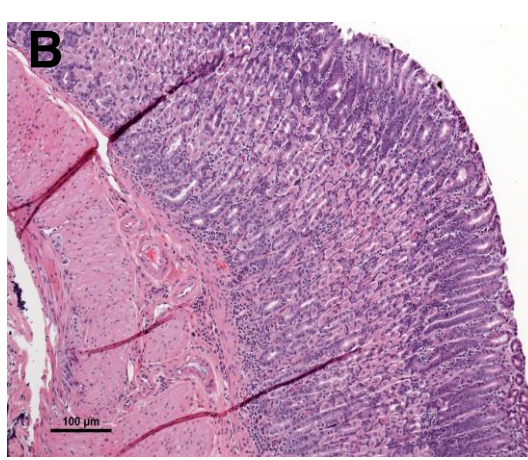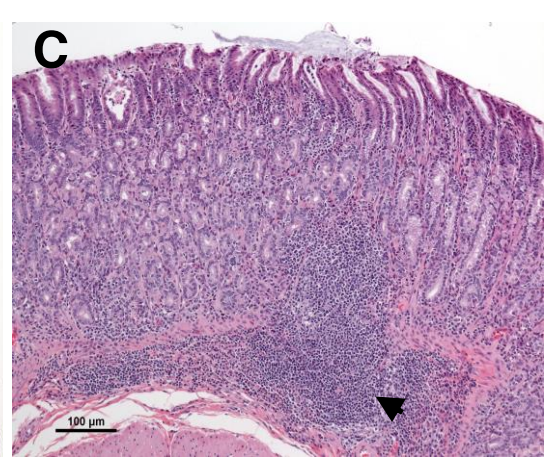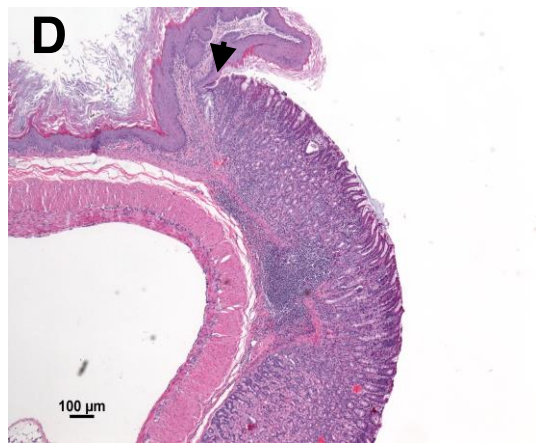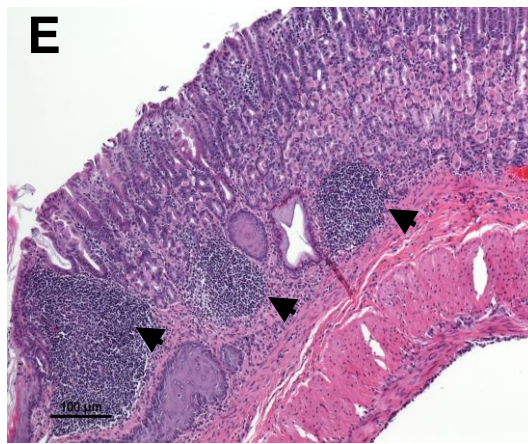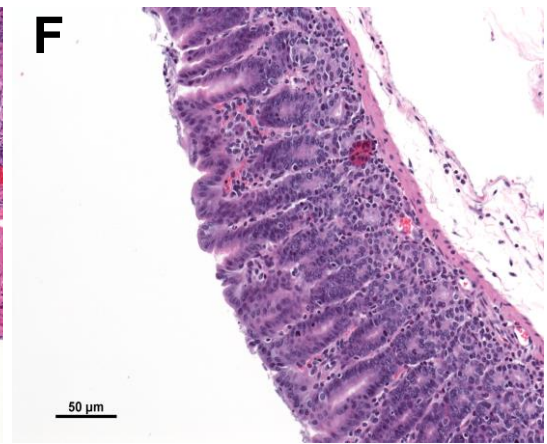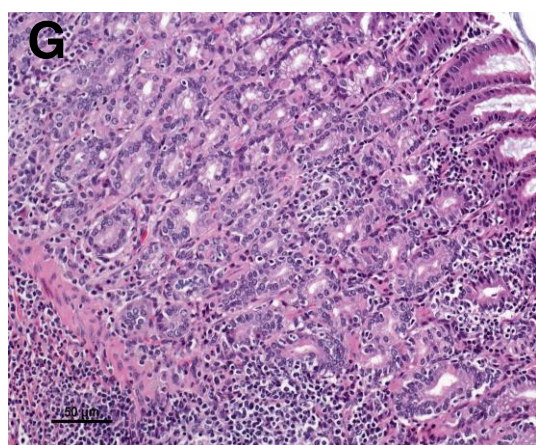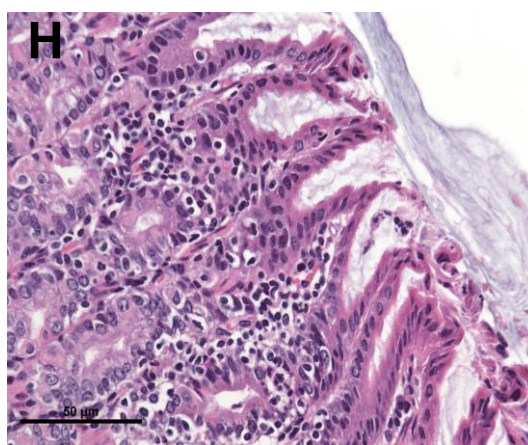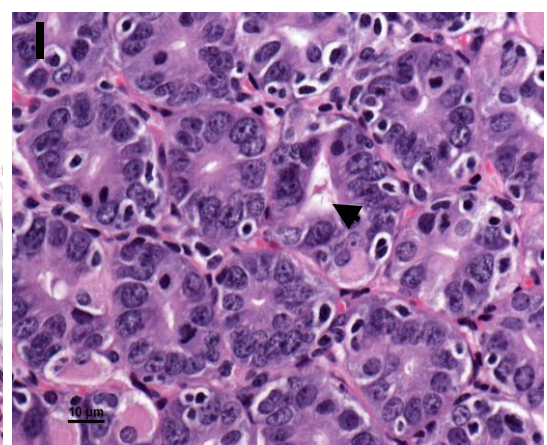

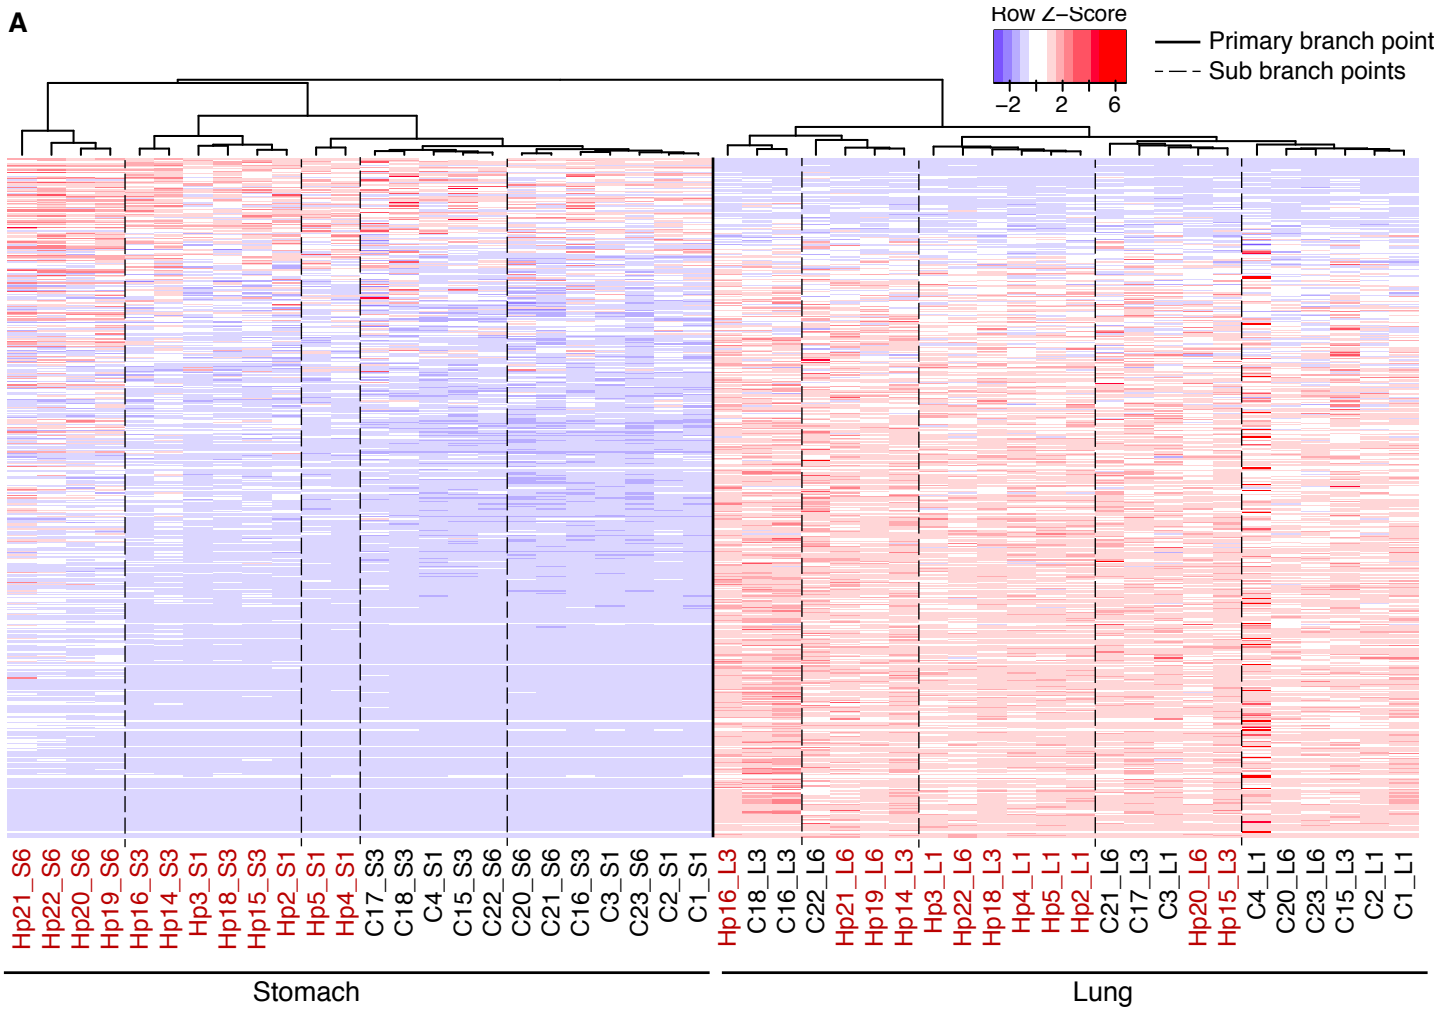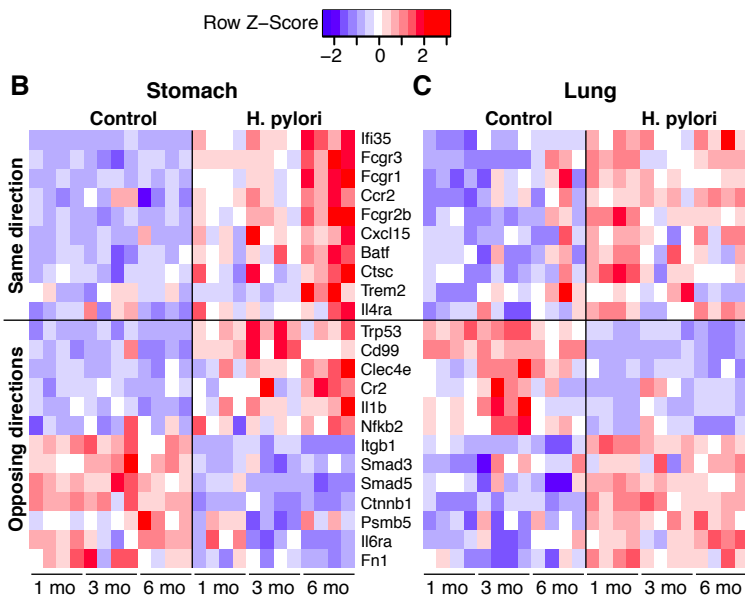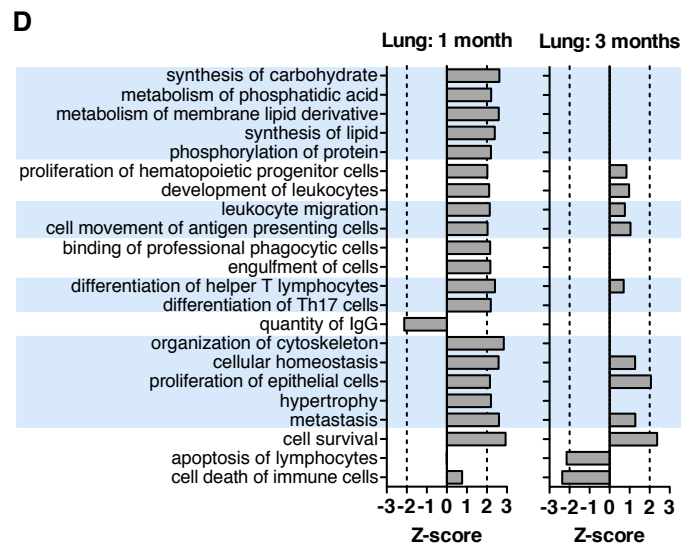



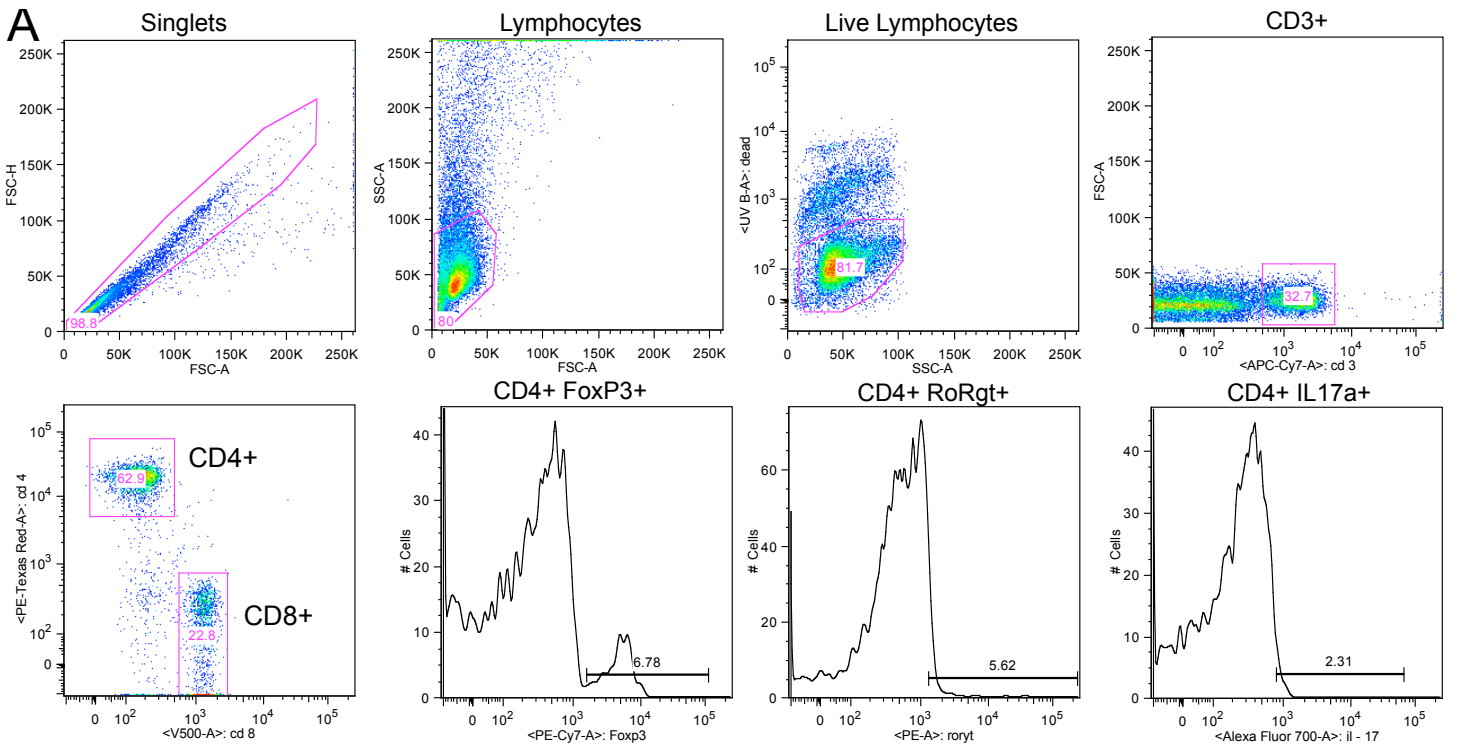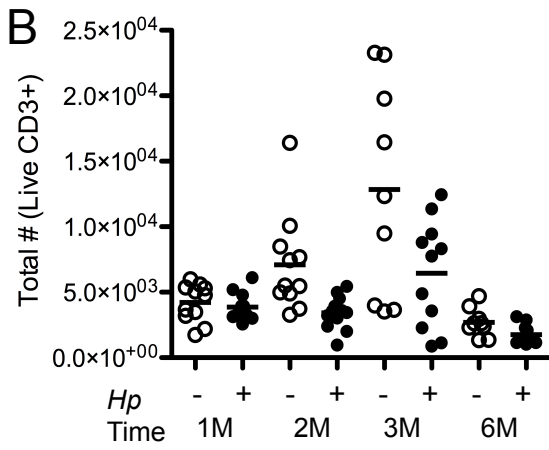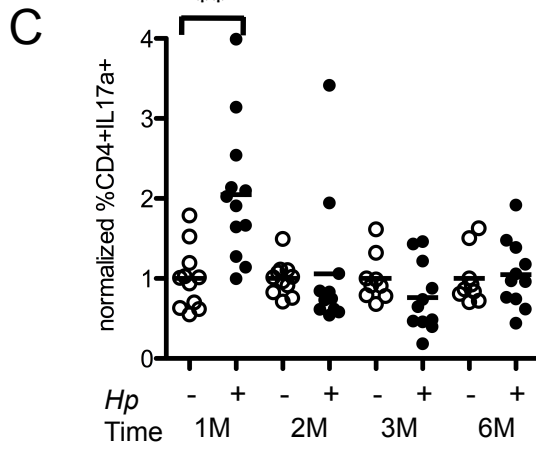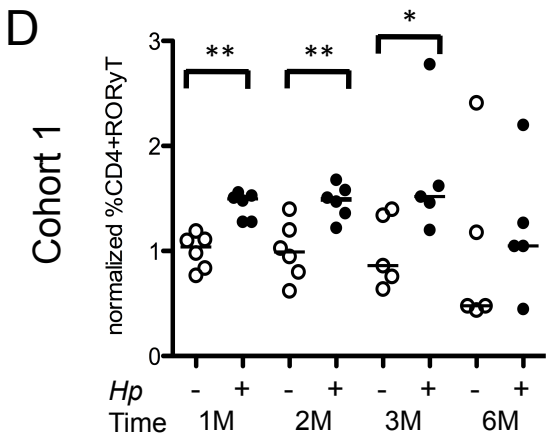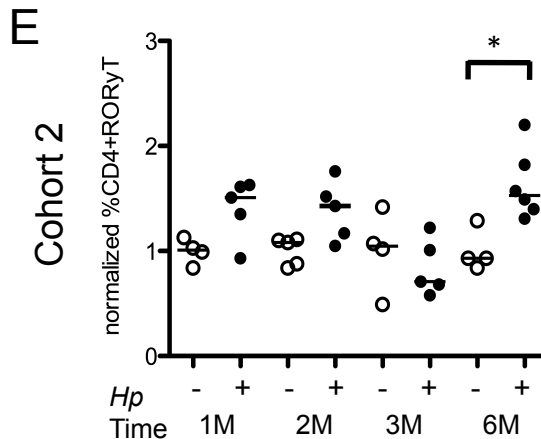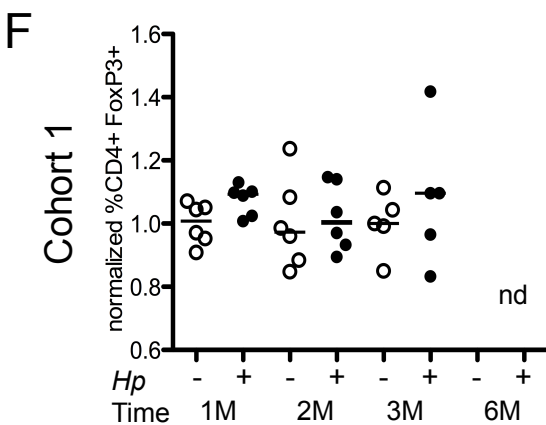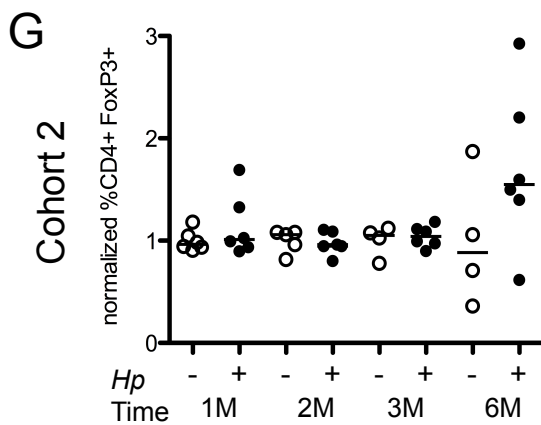

# Stomach

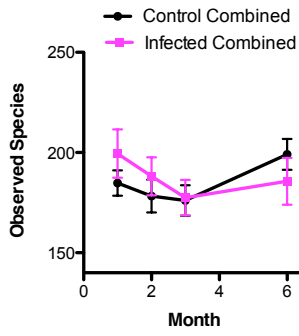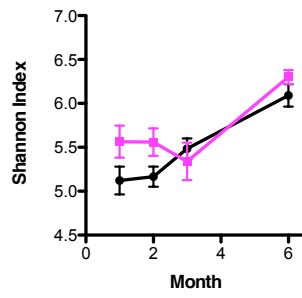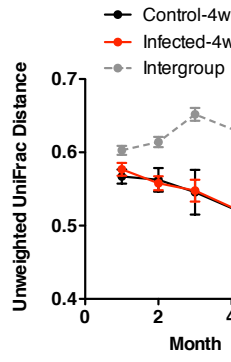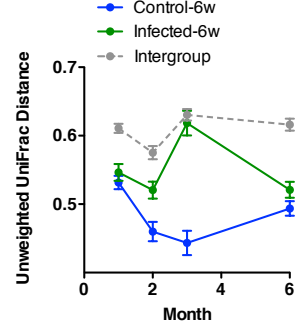

# Fecal

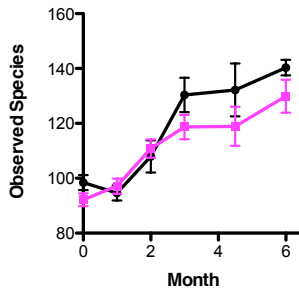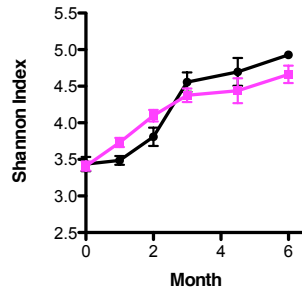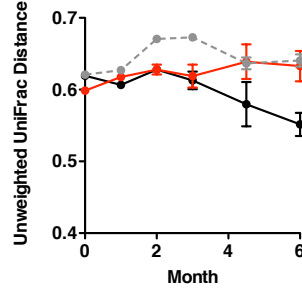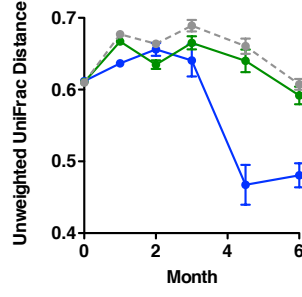

# Cecal

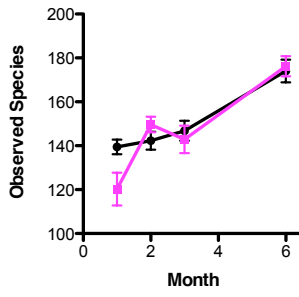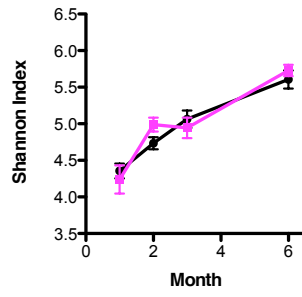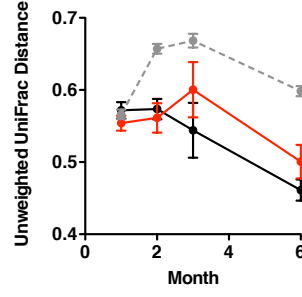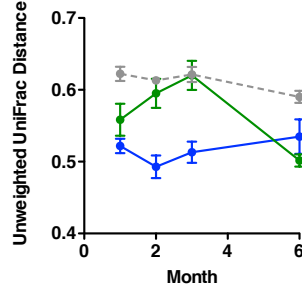

# Ileal

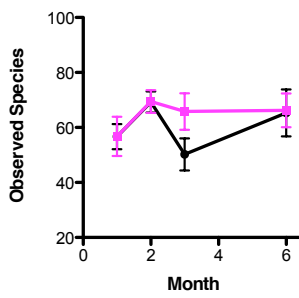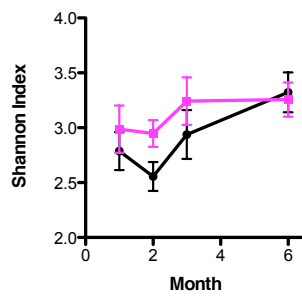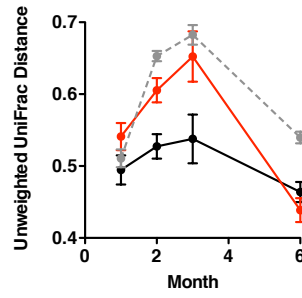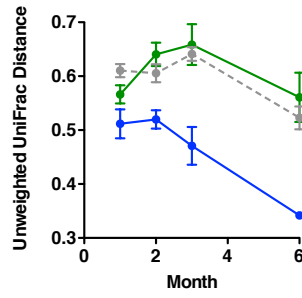



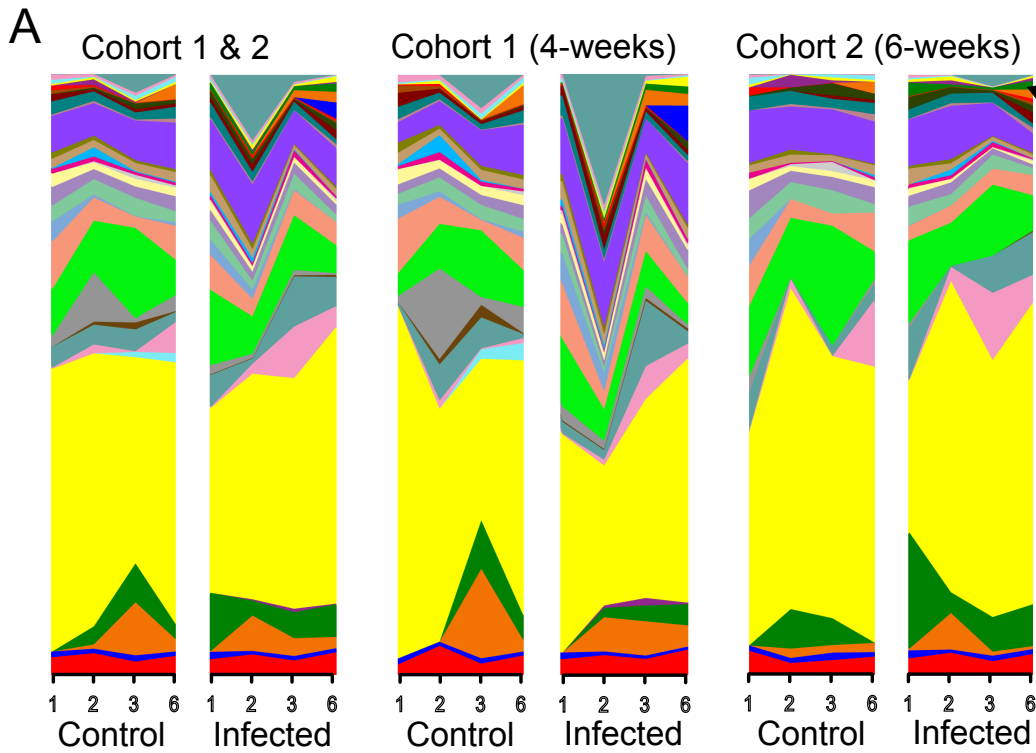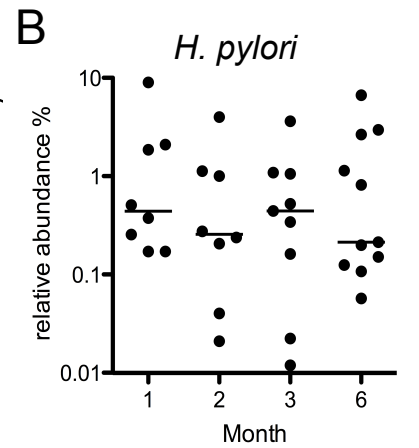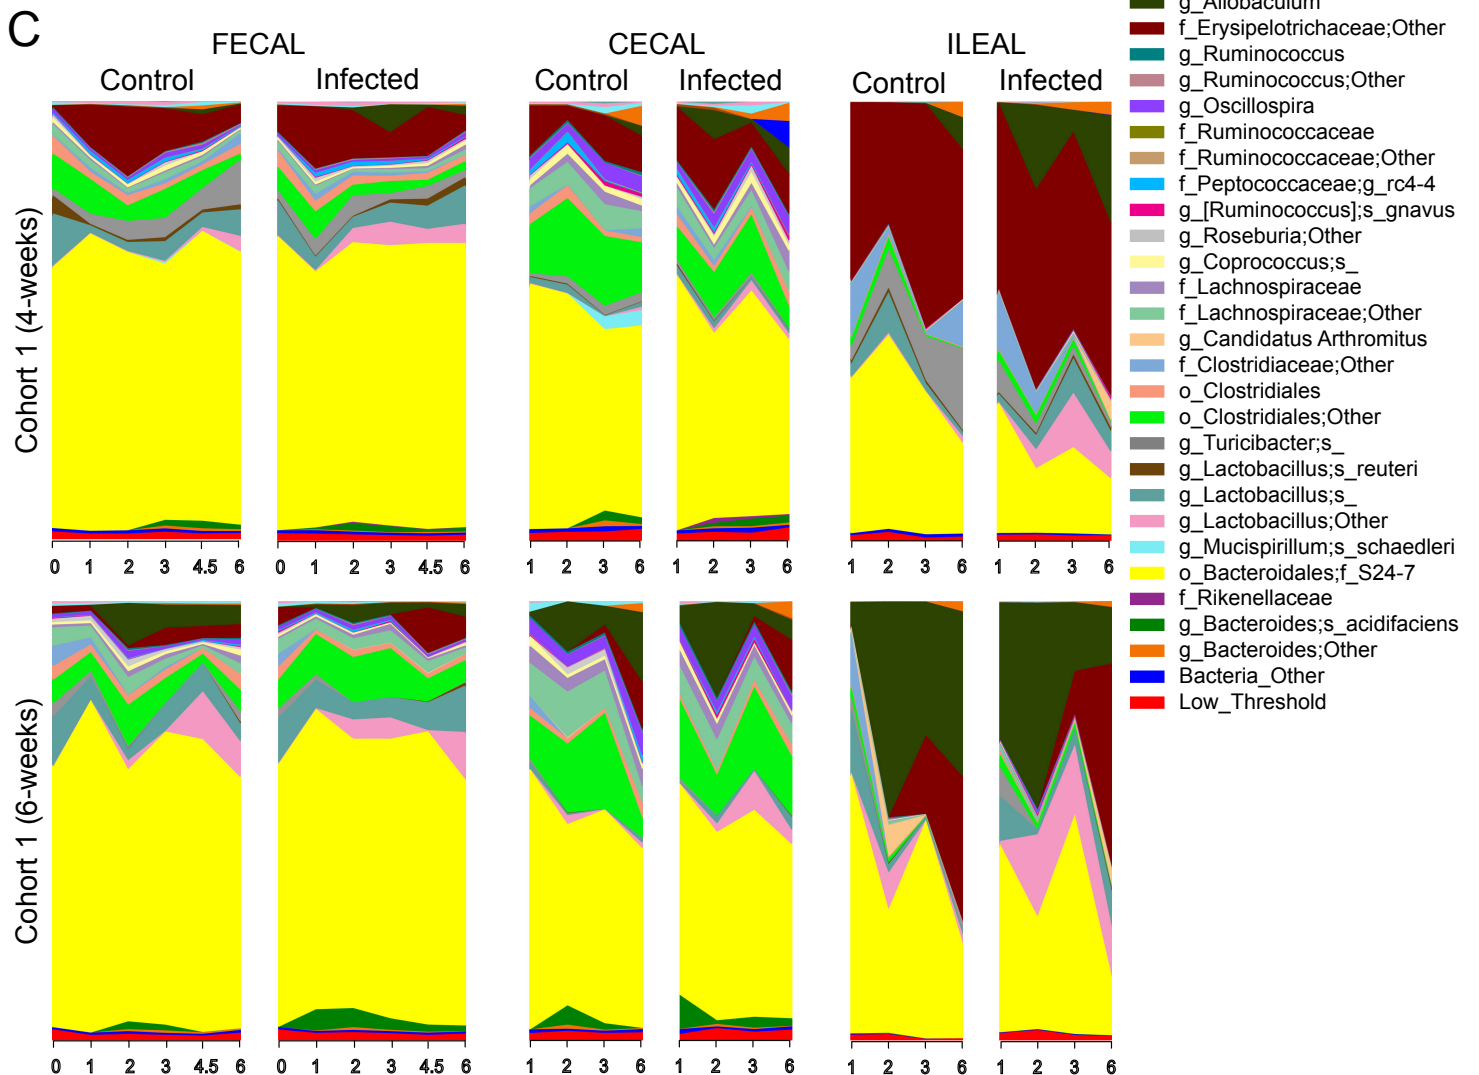

## SUPPLEMENTAL FIGURE LEGENDS

**Figure S1. Study overview, related to Figure 1.** Mice were challenged with *H. pylori* strain PMSS1 at the age of 4-weeks (Cohort 1) or 6-weeks (Cohort 2 and Cohort 3). Mice of each cohort were either gavaged with Brucella Broth (BB) (Control) or  $10^9$  CFU *H. pylori* suspended in BB (Infected) at day 0. Before sacrifice, blood was collected from Cohorts 1 and 2 every other day and analyzed for early antibody responses and antibody and ghrelin responses at the time of sacrifice (indicated by +). Fecal samples from mice in all two Cohorts were collected and subjected to 16S rRNA sequencing (time points indicated by +). The time of sacrifice and organ collection (stomach, lung, ileum, and cecum) was 1, 2, 3 and 6 months (Cohorts 1 and 2) and 2 months (Cohort 3) after challenge (indicated by +). Numbers of control (C) and infected (I) mice is shown below the thick arrows. Colonization status of *H. pylori*-infected and non-infected control mice of each cohort at sacrifice as verified by culture and *H. pylori glmM* PCR.

**Figure S2. Histopathology of C57/Bl6 mice three months post-infection, related to Figure 2.** Compared to an uninfected control (A), infected mice showed moderate (B) to severe (C) chronic active inflammation in the gastric corpus. Inflammatory cells were arranged around gastric glands in the lamina propria and extended to the submucosa in severe cases (arrow head in C). Inflammation was pronounced in the gastric corpus adjacent to the esophageal-gastric junction (arrow head in D). In severe cases, lymphoid follicles were evident (arrow heads in E) and chronic inflammation also was evident in the gastric antrum (F). Higher magnification indicates a mixed inflammatory infiltrate scattered around gastric glands mirroring human type B gastritis (G, H). Infrequent rod-shaped bacteria typical for *H. pylori* were visible within gastric glands (I). Scale bars represent 100  $\mu\text{m}$  (A-E), 50  $\mu\text{m}$  (F-H) and 10  $\mu\text{m}$  (I); Representative photomicrographs were obtained from mice sacrificed 3 or 6 months post-infection.

**Figure S3. Tissue-specific immune gene expression profiles, related to Figure 3. (A)** Expression of 547 genes related to mouse immunity were measured with the Nanostring n-counter Mouse Immunology Kit from mouse pulmonary and gastric tissues collected 1, 3, or 6 months following gavage with either *H. pylori* (Hp) or brucella broth alone (control, C). Heatmap showing relative gene expression values, with rows ordered by the ratio of average gastric expression divided by average pulmonary expression, and columns ordered by hierarchical clustering. Sample names are colored by colonization status (control, black; *H. pylori*, red). **(B-C)** Heat maps show expression levels of genes significantly different (FDR-adjusted p-value < 0.05, t-test) for  $\geq 1$  time point in both tissues. **(D)** Induced or repressed predicted biological functions in the lung in response to *H. pylori*-infection.

**Figure S4. Increased proportions of Th17 cells in the lungs of *H. pylori*-infected mice, related to Figure 4 and Table 1. (A)** Representative gating strategy (control mouse). Cells isolated from pulmonary specimens were first gated for singlets (FSC-H vs. FSC-A) and lymphocytes (SSC-A vs. FSC-A). The lymphocyte gate was further analyzed for their uptake of the Live/Dead Fixable blue dead stain to obtain only viable T-cells (UV-B vs SSC-A) expressing CD3+ (FSC-A vs Cy7-A). From this gated population, CD4 and CD8 surface expression was determined and subsequently CD4+ cells were analyzed for ROR $\gamma$ T+, FoxP3+ and IL17a+ expression (gated similarly but from a stimulated subpopulation of isolated lymphocytes) (also see **Figure 4**). **(B)** Total count of live CD3+ cells isolated from the lung of control and *H. pylori*-infected mice. **(C)** Quantitation of frequency of CD4+ IL17a+ cells in control and *H. pylori*-infected mice. **(D-G)** Proportions of CD3+ CD4+ ROR $\gamma$ T+ (Th17) cells and CD3+ CD4+ FoxP3+ (T-reg) cells in the lungs of *H. pylori*-infected mice. Quantitation of frequency of CD4+ ROR $\gamma$ T+ cells (Th17) for Cohort 1 **(D)** and Cohort 2 **(E)**. Frequency of CD4+ FoxP3+ cells (T-reg) for Cohort 1 **(F)** and Cohort 2 **(G)**. **(C-G)** Results for each mouse normalized to the respective controls for each time point (average of controls for each month). Horizontal bars indicate group mean values. (-) Uninfected control; (+) *H.*

*pylori*-infected; (M) month; Statistical analysis was performed using Mann-Whitney U-Test, \* P<0.05; \*\* P<0.01;

**Figure S5. Microbial diversity and unweighted UniFrac Distances of control and *H. pylori*-challenged mice, related to Figure 5 and Figure 6.** Observed species and Shannon index for stomach, fecal, cecal, and ileal samples over the 6-month study period of the combined Cohorts (left panels). Unweighted UniFrac Distances for Cohort 1 and Cohort 2 over time, including the Intergroup distances (right panels).

**Figure S6. Effects of *H. pylori* colonization on gastrointestinal microbial composition over 6 months, related to Figure 5 and Figure 6.** Mean relative abundance of bacteria present in intestinal samples from control and *H. pylori*-infected mice. **(A)** Relative abundance in stomach samples. All species identified with abundance >0.1% were used to generate relative abundance plots. Shown is the combination of Cohort 1 (4-weeks) and Cohort 2 (6-weeks), as well as each Cohort separately. Arrow indicates *H. pylori*. **(B)** Relative abundance of *H. pylori* in the stomach, as determined by 16S rRNA gene high throughput sequencing. **(C)** Relative abundance in fecal, cecal, and ileal samples. Taxa listed have relative abundance >1% in any sample at the lowest possible level of identification; c, class; o, order; f, family; g, genus; s, species. Analysis at depth 3000 showed similar results, but with fewer samples (data not shown).

**SUPPLEMENTAL TABLES**

**Table S1. Number of enriched taxa in the stomach according to LEfSe for each cohort vs controls, and significant taxa shared between cohorts, related to Figure 5 and Figure S6.**

|                      |       | Total |    |    |    | Phylum |   |   |   | Class |   |   |   | Order |   |   |    | Family |    |   |    | Genus |    |    |    | Species |    |    |    |
|----------------------|-------|-------|----|----|----|--------|---|---|---|-------|---|---|---|-------|---|---|----|--------|----|---|----|-------|----|----|----|---------|----|----|----|
| Month                |       | 1     | 2  | 3  | 6  | 1      | 2 | 3 | 6 | 1     | 2 | 3 | 6 | 1     | 2 | 3 | 6  | 1      | 2  | 3 | 6  | 1     | 2  | 3  | 6  | 1       | 2  | 3  | 6  |
| Cohort 1<br>(4-week) | Total | 57    | 78 | 48 | 77 | 2      | 3 | 3 | 3 | 5     | 6 | 4 | 8 | 8     | 6 | 4 | 11 | 9      | 13 | 7 | 14 | 13    | 22 | 14 | 20 | 20      | 28 | 16 | 21 |
|                      | ↓ 108 | 18    | 32 | 19 | 39 | 1      | 1 | 1 | 2 | 2     | 2 | 1 | 3 | 3     | 3 | 1 | 5  | 3      | 6  | 2 | 7  | 4     | 9  | 7  | 11 | 5       | 11 | 7  | 11 |
|                      | ↑ 152 | 39    | 46 | 29 | 38 | 1      | 2 | 2 | 1 | 3     | 4 | 3 | 5 | 5     | 3 | 3 | 6  | 6      | 7  | 5 | 7  | 9     | 13 | 7  | 9  | 15      | 17 | 9  | 10 |
| Cohort 2<br>(6-week) | Total | 61    | 50 | 42 | 75 | 2      | 3 | 0 | 2 | 4     | 6 | 2 | 6 | 5     | 7 | 4 | 10 | 12     | 9  | 8 | 16 | 17    | 10 | 13 | 19 | 20      | 15 | 15 | 22 |
|                      | ↓ 115 | 32    | 15 | 25 | 43 | 1      | 1 | 0 | 1 | 1     | 1 | 1 | 1 | 2     | 1 | 3 | 5  | 6      | 2  | 4 | 10 | 10    | 4  | 8  | 12 | 11      | 6  | 9  | 14 |
|                      | ↑ 113 | 29    | 35 | 17 | 32 | 1      | 2 | 0 | 1 | 3     | 5 | 1 | 5 | 3     | 6 | 1 | 5  | 6      | 7  | 4 | 6  | 7     | 6  | 5  | 7  | 9       | 9  | 6  | 8  |
| Shared               | Total | 10    | 17 | 6  | 29 | 0      | 2 | 0 | 1 | 2     | 3 | 0 | 4 | 2     | 2 | 0 | 6  | 2      | 3  | 1 | 7  | 2     | 2  | 2  | 5  | 2       | 5  | 3  | 6  |
|                      | ↓     | 5     | 6  | 1  | 8  | 0      | 1 | 0 | 0 | 1     | 2 | 0 | 2 | 1     | 1 | 0 | 2  | 1      | 1  | 0 | 2  | 1     | 0  | 0  | 1  | 1       | 1  | 1  | 1  |
|                      | ↑     | 2     | 2  | 2  | 15 | 0      | 0 | 0 | 1 | 0     | 0 | 0 | 1 | 0     | 0 | 0 | 3  | 0      | 0  | 0 | 3  | 1     | 1  | 1  | 3  | 1       | 1  | 1  | 4  |
|                      | ↑↓    | 3     | 9  | 3  | 6  | 0      | 1 | 0 | 0 | 1     | 1 | 0 | 1 | 1     | 1 | 0 | 1  | 1      | 2  | 1 | 2  | 0     | 1  | 1  | 1  | 0       | 3  | 1  | 1  |

↓ down in *H. pylori*-infected compared to control, ↑ up in *H. pylori*-infected compared to control, ↑↓ same taxa affected but different direction in the two cohorts; shaded block indicates taxonomic differences vs. controls that are shared across both cohorts



**Table S2. Gastric taxa affected  $\geq$  two time points in the same direction, related to Figure 5 and Figure S6.\***

| Taxa – Cohort 1 (4-weeks)                                                        | Log LDA scores by month |          |          |          |
|----------------------------------------------------------------------------------|-------------------------|----------|----------|----------|
|                                                                                  | 1                       | 2        | 3        | 6        |
| p_Bacteroidetes.c_Bacteroidia.o_Bacteroidales.f_Bacteroidaceae.g_Bacteroides.s_  |                         | 3.56     | 3.88     |          |
| <b>p_B.c_B.o_Bacteroidales.f_Rikenellaceae</b>                                   |                         | 3.40     | 3.79     | 3.65     |
| <b>p_B.c_B.o_Bacteroidales.f_Rikenellaceae.g_</b>                                |                         | 3.40     | 3.78     | 3.11     |
| <b>p_B.c_B.o_Bacteroidales.f_Rikenellaceae.g_s_</b>                              |                         | 3.40     | 3.78     | 3.11     |
| p_B.c_B.o_Bacteroidales.f_S24_7                                                  | -5.06                   | -4.94    |          |          |
| p_B.c_B.o_Bacteroidales.f_S24_7.g_                                               | -5.06                   | -4.94    |          |          |
| p_B.c_B.o_Bacteroidales.f_S24_7.g_s_                                             | -5.06                   | -4.94    |          |          |
| p_Firmicutes.c_Bacilli.o_Lactobacillales                                         | 3.87                    |          |          | 4.19     |
| p_F.c_B.o_Lactobacillales.f_Lactobacillaceae.g_Lactobacillus.Other               |                         |          | 4.46     | 3.87     |
| p_F.c_Clostridia.o_Clostridiales.f_Lachnospiraceae.g_Roseburia                   | 3.52                    |          | 3.37     |          |
| p_F.c_C.o_Clostridiales.f_Lachnospiraceae.g_Roseburia.Other                      | 3.52                    |          | 3.37     |          |
| p_F.c_C.o_Clostridiales.f_Ruminococcaceae.g_Oscillospira.Other                   | 3.62                    | 3.99     |          |          |
| p_F.c_Erysipelotrichi.o_Erysipelotrichales.f_Erysipelotrichaceae.g_Coprobacillus |                         |          | -3.54    | -3.01    |
| p_F.c_E.o_Erysipelotrichales.f_Erysipelotrichaceae.g_Coprobacillus.s_            |                         |          | -3.52    | -3.01    |
| p_Proteobacteria                                                                 |                         |          | 4.35     | 4.57     |
| <b>p_P.c_Deltaproteobacteria</b>                                                 |                         | 3.44     | 4.12     | 4.36     |
| <b>p_P.c_D.o_Desulfovibrionales</b>                                              |                         | 3.44     | 4.12     | 4.36     |
| <b>p_P.c_D.o_Desulfovibrionales.f_Desulfovibrionaceae</b>                        |                         | 3.44     | 4.12     | 4.36     |
| p_P.c_D.o_Desulfovibrionales.f_Desulfovibrionaceae.g_Bilophila                   |                         | 3.39     | 3.54     |          |
| p_P.c_D.o_Desulfovibrionales.f_Desulfovibrionaceae.g_Bilophila.s_                |                         | 3.39     | 3.54     |          |
| p_P.c_D.o_Desulfovibrionales.f_Desulfovibrionaceae.g_Desulfovibrio               |                         | 3.18     | 4.10     |          |
| p_P.c_D.o_Desulfovibrionales.f_Desulfovibrionaceae.g_Desulfovibrio.s_C21_c20     |                         | 3.18     | 4.10     |          |
| p_P.c_Epsilonproteobacteria                                                      | 3.14                    | a        | a        | 3.77     |
| p_P.c_E.o_Campylobacterales                                                      | 3.14                    |          |          | 3.77     |
| p_P.c_E.o_Campylobacterales.f_Helicobacteraceae                                  | 3.14                    |          |          | 3.77     |
| p_P.c_E.o_Campylobacterales.f_Helicobacteraceae.g_Helicobacter                   | 3.14                    |          |          | 3.77     |
| p_P.c_E.o_Campylobacterales.f_Helicobacteraceae.g_Helicobacter.s_pylori          | 3.14                    |          |          | 3.77     |
| p_Tenericutes.c_Mollicutes.o_RF39                                                | -3.47                   |          |          | -3.21    |
| p_T.c_M.o_RF39.f_                                                                | -3.47                   |          |          | -3.21    |
| p_T.c_M.o_RF39.f.g_                                                              | -3.47                   |          |          | -3.21    |
| p_T.c_M.o_RF39.f.g_s_                                                            | -3.47                   |          |          | -3.21    |
| <b>Taxa Cohort 2 (6-weeks)</b>                                                   | <b>1</b>                | <b>2</b> | <b>3</b> | <b>6</b> |
| p_Actinobacteria                                                                 |                         | 3.28     |          | 3.18     |
| p_A.c_Actinobacteria                                                             |                         | 3.27     |          | 3.09     |
| p_A.c_A.o_Bifidobacteriales                                                      |                         | 3.15     |          | 3.10     |
| p_A.c_A.o_Bifidobacteriales.f_Bifidobacteriaceae                                 |                         | 3.15     |          | 3.10     |
| p_A.c_A.o_Bifidobacteriales.f_Bifidobacteriaceae.g_Bifidobacterium               |                         | 3.15     |          | 3.10     |
| p_A.c_A.o_Bifidobacteriales.f_Bifidobacteriaceae.g_Bifidobacterium.Other         |                         | 3.15     |          | 3.10     |
| p_Bacteroidetes.c_Bacteroidia.o_Bacteroidales.f_Bacteroidaceae                   | 4.99                    |          |          | 4.45     |
| p_B.c_B.o_Bacteroidales.f_Bacteroidaceae.g_Bacteroides                           | 4.99                    |          |          | 4.45     |
| p_B.c_B.o_Bacteroidales.Other                                                    | 3.18                    |          | 2.83     |          |
| p_B.c_B.o_Bacteroidales.Other.Other                                              | 3.18                    |          | 2.80     |          |
| p_B.c_B.o_Bacteroidales.Other.Other.Other                                        | 3.18                    |          | 2.79     |          |

|                                                                                |              |              |              |              |
|--------------------------------------------------------------------------------|--------------|--------------|--------------|--------------|
| p_Firmicutes.c_Clostridia.o_Clostridiales.f_Clostridiaceae                     | <b>-4.36</b> | <b>-2.82</b> | <b>-3.14</b> |              |
| p_F.c_C.o_Clostridiales.f_Lachnospiraceae.g_                                   | <b>-4.13</b> |              | <b>-3.80</b> | <b>-4.07</b> |
| p_F.c_C.o_Clostridiales.f_Lachnospiraceae.g_s_                                 | <b>-4.13</b> |              | <b>-3.81</b> | <b>-4.08</b> |
| p_F.c_C.o_Clostridiales.f_Lachnospiraceae.g_Coproccoccus                       | <b>-3.56</b> |              | <b>-3.62</b> | <b>-3.54</b> |
| p_F.c_C.o_Clostridiales.f_Lachnospiraceae.g_Coproccoccus.s_                    | <b>-3.56</b> |              | <b>-3.60</b> | <b>-3.50</b> |
| p_F.c_C.o_Clostridiales.f_Lachnospiraceae.g_Roseburia                          |              | -3.18        | -3.86        |              |
| p_F.c_C.o_Clostridiales.f_Lachnospiraceae.g_Roseburia.Other                    |              | -3.18        | -3.87        |              |
| p_F.c_C.Other                                                                  |              |              | -2.85        | -2.89        |
| p_F.c_C.Other.Other                                                            |              |              | -2.85        | -2.94        |
| p_F.c_C.Other.Other.Other                                                      |              |              | -2.88        | -2.92        |
| p_F.c_C.Other.Other.Other.Other                                                |              |              | -2.94        | -2.92        |
| <b>p_F.c_Erysipelotrichi</b>                                                   | <b>4.03</b>  | <b>3.72</b>  |              | <b>4.11</b>  |
| <b>p_F.c_E.o_Erysipelotrichales</b>                                            | <b>4.03</b>  | <b>3.72</b>  |              | <b>4.08</b>  |
| <b>p_F.c_E.o_Erysipelotrichales.f_Erysipelotrichaceae</b>                      | <b>4.03</b>  | <b>3.72</b>  |              | <b>4.12</b>  |
| <b>p_Proteobacteria.c_Alphaproteobacteria</b>                                  |              | <b>2.65</b>  |              | <b>3.49</b>  |
| <b>p_P.c_Epsilonproteobacteria</b>                                             | <b>4.04</b>  | <b>3.34</b>  | <b>3.33</b>  | <b>3.86</b>  |
| <b>p_P.c_E.o_Campylobacterales</b>                                             | <b>4.04</b>  | <b>3.34</b>  | <b>3.33</b>  | <b>3.86</b>  |
| <b>p_P.c_E.o_Campylobacterales.f_Helicobacteraceae</b>                         | <b>4.04</b>  | <b>3.34</b>  | <b>3.33</b>  | <b>3.86</b>  |
| <b>p_P.c_E.o_Campylobacterales.f_Helicobacteraceae.g_Helicobacter</b>          | <b>4.04</b>  | <b>3.34</b>  | <b>3.33</b>  | <b>3.86</b>  |
| <b>p_P.c_E.o_Campylobacterales.f_Helicobacteraceae.g_Helicobacter.s_pylori</b> | <b>4.04</b>  | <b>3.34</b>  | <b>3.33</b>  | <b>3.86</b>  |

\*Criteria for inclusion of taxa in table: significantly affected (LEfSe) at  $\geq$  two time points but never in opposite direction at any other time point; Numbers in grey shading represent those, up in infected; no shading represents those down in infected. **bold**; taxa affected at three time points; a, although culture or PCR positive, in only 3 of 5 infected mice were *H. pylori* 16S sequences detected.

**Table S3. Gastric species affected by *H. pylori* presence, over time and by cohort, related to Figure 5 and Figure S6.**

|            |                         | Log LDA scores by month and Cohort |              |             |             |             |              |              |              |
|------------|-------------------------|------------------------------------|--------------|-------------|-------------|-------------|--------------|--------------|--------------|
| Month      |                         | 1                                  |              | 2           |             | 3           |              | 6            |              |
| A          | Cohort                  | 1                                  | 2            | 1           | 2           | 1           | 2            | 1            | 2            |
|            | p_Bacteroidetes         | -5.06                              |              |             |             |             |              |              |              |
|            | c_Bacteroidia           | -5.06                              |              |             |             |             |              |              |              |
|            | o_Bacteroidales         | -5.06                              |              |             |             |             |              |              |              |
|            | f_Bacteroidaceae        |                                    | 4.99         | 4.56        |             | -4.88       |              |              | 4.45         |
|            | g_Bacteroides           |                                    | 4.99         | 4.56        |             | -4.88       |              |              | 4.45         |
| <b>2</b>   | <b>s_Bacteroides</b>    |                                    |              | <b>3.56</b> | <b>2.68</b> | <b>3.88</b> |              |              |              |
|            | f_Rikenellaceae         |                                    |              | 3.40        |             | 3.79        |              | 3.65         | -3.02        |
|            | g_Rikenellaceae         |                                    |              | 3.40        |             | 3.78        |              | 3.11         |              |
| <b>1</b>   | <b>s_Rikenellaceae</b>  |                                    |              | <b>3.40</b> |             | <b>3.78</b> |              | <b>3.11</b>  |              |
|            | p_Firmicutes            | 5.05                               |              |             |             |             |              |              |              |
|            | c_Bacilli               | 4.18                               |              | -4.97       |             |             |              |              |              |
|            | o_Lactobacillales       | 3.87                               |              |             |             |             |              | 4.19         |              |
|            | f_Lactobacillaceae      |                                    |              |             |             |             |              | 4.18         |              |
|            | g_Lactobacillus         |                                    |              |             |             |             |              | 4.18         |              |
| <b>2</b>   | <b>s_Other</b>          |                                    |              |             |             | <b>4.46</b> | <b>4.82</b>  | <b>3.87</b>  |              |
|            | c_Clostridia            | 5.03                               |              |             |             |             |              |              |              |
|            | o_Clostridiales         | 5.03                               |              |             |             |             |              |              |              |
|            | f_Lachnospiraceae       |                                    |              |             |             |             |              |              | -4.23        |
|            | g_Coprococcus           | -3.69                              | -3.56        |             |             |             | -3.62        |              | -3.54        |
| <b>1,2</b> | <b>s_Coprococcus</b>    | <b>-3.69</b>                       | <b>-3.56</b> |             |             |             | <b>-3.60</b> |              | <b>-3.50</b> |
|            | c_Erysipelotrichi       | -4.02                              | 4.03         | 3.95        | 3.72        |             |              | 3.74         | 4.11         |
|            | o_Erysipelotrichales    | -4.02                              | 4.03         | 3.95        | 3.72        |             |              | 3.74         | 4.08         |
|            | f_Erysipelotrichaceae   | -4.02                              | 4.03         | 3.95        | 3.72        |             |              | 3.74         | 4.12         |
|            | g_Allobaculum           |                                    | 3.97         | 3.66        |             |             |              | 3.71         |              |
| <b>3</b>   | <b>s_Allobaculum</b>    |                                    | <b>3.97</b>  | <b>3.66</b> |             |             |              | <b>3.71</b>  |              |
|            | c_Epsilonproteobacteria | 3.14                               | 4.04         |             | 3.34        |             | 3.33         | 3.77         | 3.86         |
|            | o_Campylobacterales     | <b>3.14</b>                        | <b>4.04</b>  |             | <b>3.34</b> |             | <b>3.33</b>  | <b>3.77</b>  | <b>3.86</b>  |
|            | f_Helicobacteraceae     | 3.14                               | 4.04         |             | 3.34        |             | 3.33         | 3.77         | 3.86         |
|            | g_Helicobacter          | 3.14                               | 4.04         |             | 3.34        |             | 3.33         | 3.77         | 3.86         |
| <b>1,2</b> | <b>s_pylori</b>         | <b>3.14</b>                        | <b>4.04</b>  |             | <b>3.34</b> |             | <b>3.33</b>  | <b>3.77</b>  | <b>3.86</b>  |
|            | p_Tenericutes           |                                    | -3.63        | 3.48        | 3.02        |             |              | -3.65        | -3.63        |
|            | c_Mollicutes            |                                    | -3.63        | 3.48        | 3.02        |             |              | -3.65        | -3.66        |
|            | o_RF39                  | <b>-3.47</b>                       |              |             |             |             |              | <b>-3.21</b> | <b>-3.01</b> |
|            | f_RF39                  | -3.47                              |              |             |             |             |              | -3.21        | -3.02        |
|            | g_RF39                  | -3.47                              |              |             |             |             |              | -3.21        | -3.04        |
| <b>2</b>   | <b>s_RF39</b>           | <b>-3.47</b>                       |              |             |             |             |              | <b>-3.21</b> | <b>-3.00</b> |

<sup>A</sup>Criteria for inclusion of species in Table: (1) significantly (LEfSe) up or down at three time points in one Cohort and not in the opposite direction in the other cohort; (2) shared between cohorts, same direction at specific time point, not affected in opposite direction; and affected in one cohort in the same direction  $\geq$  one other time point; (3) family affected significantly in both cohorts, but no apparently shared taxa affected, when cohorts combined, only *Allobaculum* at the two time points was up in infected; numbers in grey shading represent those taxa up in infected; no shading represents those down in infected. **bold**; species level

**Table S4. Affected species of Cohort 3, that are shared with Cohort 1 or 2, related to Figure 5 and Figure 6.**

|    |                           | Log LDA scores by month and Cohort |      |       |       |       |       |       |       |       |
|----|---------------------------|------------------------------------|------|-------|-------|-------|-------|-------|-------|-------|
|    | Month                     | 1                                  |      | 2     |       |       | 3     |       | 6     |       |
| A  | Cohort                    | 1                                  | 2    | 1     | 2     | 3     | 1     | 2     | 1     | 2     |
| ST | Turicibacter.s_           | 3.87                               |      | -4.48 |       | -4.6  |       |       | -4.26 | -3.16 |
| ST | Erysipelotrichaceae.other |                                    |      | 3.94  |       | 3.00  |       |       |       | 3.87  |
| ST | Desulfovibrio.s_C21_c20   |                                    |      | 3.18  |       | 4.00  | 4.12  |       |       |       |
| ST | Helicobacter.s_pylori     | 3.14                               | 4.04 |       | 3.34  | 3.70  |       | 3.33  | 3.77  | 3.86  |
| F  | Turicibacter.s_           | 3.84                               | 3.52 |       | -3.39 | -4.30 | -4.14 | -3.32 | -4.62 | -4.07 |
| I  | Erysipelotrichaceae.other |                                    |      | 5.00  |       | 3.40  |       |       |       |       |
| I  | Desulfovibrio.s_C21_c20   |                                    |      | 3.71  |       | 5.00  |       |       |       |       |
| C  | Lachnospiraceae.other     |                                    |      | -4.08 |       | -3.60 |       |       |       |       |
| C  | Oscilospira.s_            | -3.75                              |      | 3.78  |       | 4.30  |       |       |       | -3.99 |
| C  | Desulfovibrio.s_C21_c20   |                                    |      | 3.44  |       | 4.40  |       |       |       |       |

\*Criteria for inclusion of species in Table: significantly affected (LEfSe) species from Cohort 3 that were also affected in the same direction in Cohort 1 or 2 and remained different over time or were later not affected at all. <sup>A</sup>sampling site; ST, stomach; F, feces; I, ileum; C, cecum;

**Table S5. The effect of *H. pylori* infection on microbial community structure, related to Figure 5 and Figure 6.**

| ADONIS P-values, Control vs. Inoculated, in unweighted UniFrac analysis |       |              |                    |                    |
|-------------------------------------------------------------------------|-------|--------------|--------------------|--------------------|
| Location                                                                | Month | Both Cohorts | 4-week inoculation | 6-week inoculation |
| Ileum                                                                   | 1     | 0.131        | 0.577              | <b>0.009</b>       |
|                                                                         | 2     | 0.141        | <b>0.001</b>       | 0.134              |
|                                                                         | 3     | <b>0.025</b> | <b>0.029</b>       | <b>0.018</b>       |
|                                                                         | 6     | <b>0.011</b> | <b>0.005</b>       | 0.060              |
| Cecum                                                                   | 1     | 0.192        | 0.631              | <b>0.006</b>       |
|                                                                         | 2     | <b>0.043</b> | <b>0.003</b>       | <b>0.007</b>       |
|                                                                         | 3     | 0.080        | <b>0.028</b>       | <b>0.019</b>       |
|                                                                         | 6     | <b>0.001</b> | <b>0.011</b>       | <b>0.006</b>       |
| Fecal                                                                   | 0     | 0.168        | <b>0.040</b>       | 0.940              |
|                                                                         | 1     | <b>0.019</b> | <b>0.035</b>       | <b>0.002</b>       |
|                                                                         | 2     | <b>0.028</b> | <b>0.001</b>       | 0.127              |
|                                                                         | 3     | <b>0.050</b> | <b>0.003</b>       | 0.083              |
|                                                                         | 4.5   | <b>0.001</b> | <b>0.039</b>       | <b>0.004</b>       |
|                                                                         | 6     | <b>0.031</b> | <b>0.006</b>       | <b>0.006</b>       |

Compositional differences were measured by unweighted UniFrac distances and significance testing was performed using the ADONIS test, with 999 permutations. The table displays p-values, with values <0.05 in **bold** text.

**Table S6. Fecal taxa affected at  $\geq$  two time points in the same direction, related to Figure 6 and Figure S6.\***

| Taxa – Cohort 1 (4-weeks)                                                             | Log LDA scores by month |              |              |              |              |
|---------------------------------------------------------------------------------------|-------------------------|--------------|--------------|--------------|--------------|
|                                                                                       | 1                       | 2            | 3            | 4.5          | 6            |
| p_Actinobacteria.c_Coriobacteria                                                      |                         | -3.26        |              |              | -3.43        |
| p_A.c_C.o_Coriobacteriales                                                            |                         | -3.06        |              |              | -3.43        |
| p_A.c_C.o_Coriobacteriales.f_Coriobacteriaceae                                        |                         | -3.06        |              |              | -3.43        |
| p_Bacteroidetes.c_Bacteroidia.o_Bacteroidales.f_Bacteroidaceae                        | 3.74                    | 4.00         |              |              |              |
| p_B.c_B.o_Bacteroidales.f_Bacteroidaceae.g_Bacteroides                                | 3.72                    | 4.00         |              |              |              |
| p_B.c_B.o_Bacteroidales.f_Bacteroidaceae.g_Bacteroides.Other                          | 3.44                    | 3.16         |              |              |              |
| p_B.c_B.o_Bacteroidales.Other                                                         |                         | 2.97         |              |              | 3.38         |
| p_B.c_B.o_Bacteroidales.Other.Other                                                   |                         | 2.97         |              |              | 3.38         |
| p_B.c_B.o_Bacteroidales.Other.Other.Other                                             |                         | 2.97         |              |              | 3.38         |
| p_Firmicutes.c_Bacilli.o_Lactobacillales.f_Lactobacillaceae.g_Lactobacillus.Other     | 3.40                    | 4.2          |              |              |              |
| p_F.c_B.o_Lactobacillales.Other                                                       |                         | 2.63         | 3.13         |              |              |
| p_F.c_B.o_Lactobacillales.Other.Other                                                 |                         | 2.63         | 3.05         |              |              |
| p_F.c_B.o_Lactobacillales.Other.Other.Other                                           |                         | 2.64         | 2.90         |              |              |
| <b>p_F.c_Erysipelotrichi.o_Erysipelotrichales.f_Erysipelotrichaceae.g_Clostridium</b> | <b>-3.84</b>            | <b>-3.04</b> | <b>-3.19</b> |              |              |
| <b>p_F.c_E.o_Erysipelotrichales.f_Erysipelotrichaceae.g_Clostridium.Other</b>         | <b>-3.83</b>            | <b>-3.05</b> | <b>-3.19</b> |              |              |
| <b>Taxa – Cohort 1 (6-weeks)</b>                                                      | <b>1</b>                | <b>2</b>     | <b>3</b>     | <b>4.5</b>   | <b>6</b>     |
| <b>p_Bacteroidetes.c_Bacteroidia.o_Bacteroidales.f_Bacteroidaceae</b>                 | <b>4.39</b>             | <b>4.12</b>  |              | <b>3.82</b>  |              |
| <b>p_B.c_B.o_Bacteroidales.f_Bacteroidaceae.g_Bacteroides</b>                         | <b>4.4</b>              | <b>4.12</b>  |              | <b>3.82</b>  |              |
| <b>p_B.c_B.o_Bacteroidales.f_Bacteroidaceae.g_Bacteroides.s_ovatus</b>                |                         |              | <b>-3.43</b> | <b>-3.33</b> | <b>-3.83</b> |
| p_F.c_Clostridia.o_Clostridiales.f_                                                   | -3.57                   |              |              |              | -4.00        |
| p_F.c_C.o_Clostridiales.f_g_                                                          | -3.57                   |              |              |              | -4.05        |
| p_F.c_C.o_Clostridiales.f_g_s_                                                        | -3.57                   |              |              |              | -4.03        |
| p_F.c_C.o_Clostridiales.f_Clostridiaceae.g_CandidatusArthromitus                      |                         | 2.85         | 3.30         |              |              |
| p_F.c_C.o_Clostridiales.f_Clostridiaceae.g_CandidatusArthromitus.s_                   |                         | 2.85         | 3.39         |              |              |
| <b>p_F.c_C.o_Clostridiales.f_Clostridiaceae.g_SMB53</b>                               | <b>-2.64</b>            | <b>-3.01</b> | <b>-3.52</b> | <b>-3.70</b> |              |
| <b>p_F.c_C.o_Clostridiales.f_Clostridiaceae.g_SMB53.s_</b>                            | <b>-2.68</b>            | <b>-2.95</b> | <b>-3.52</b> | <b>-3.76</b> |              |
| p_F.c_C.o_Clostridiales.f_Clostridiaceae.Other                                        | -3.87                   | -2.89        |              |              |              |
| p_F.c_C.o_Clostridiales.f_Clostridiaceae.Other.Other                                  | -3.87                   | -2.96        |              |              |              |
| <b>p_F.c_C.o_Clostridiales.f_Lachnospiraceae.g_Coprococcus</b>                        |                         | <b>-3.58</b> |              | <b>-3.53</b> | <b>-3.65</b> |
| <b>p_F.c_C.o_Clostridiales.f_Lachnospiraceae.g_Coprococcus.s_</b>                     |                         | <b>-3.58</b> |              | <b>-3.56</b> | <b>-3.66</b> |
| <b>p_F.c_C.o_Clostridiales.f_Lachnospiraceae.g_Roseburia</b>                          | <b>-3.64</b>            | <b>-3.87</b> | <b>-3.50</b> |              |              |
| <b>p_F.c_C.o_Clostridiales.f_Lachnospiraceae.g_Roseburia.Other</b>                    | <b>-3.64</b>            | <b>-3.87</b> | <b>-3.50</b> |              |              |
| p_F.c_C.o_Clostridiales.f_Peptococcaceae                                              |                         |              |              | -3.24        | -3.35        |
| p_F.c_C.o_Clostridiales.f_Peptococcaceae.g_rc4_4                                      |                         |              |              | -3.25        | -3.33        |
| p_F.c_C.o_Clostridiales.f_Peptococcaceae.g_rc4_4.s_                                   |                         |              |              | -3.22        | -3.35        |
| p_F.c_C.o_Clostridiales.Other                                                         | 4.38                    |              |              | 4.2          |              |
| p_F.c_C.o_Clostridiales.Other.Other                                                   | 4.38                    |              |              | 4.23         |              |
| p_F.c_C.o_Clostridiales.Other.Other.Other                                             | 4.38                    |              |              | 4.22         |              |
| p_F.c_Erysipelotrichi.o_Erysipelotrichales.f_Erysipelotrichaceae.g_Allobaculum        |                         |              | -4.17        | -4.24        |              |
| p_F.c_E.o_Erysipelotrichales.f_Erysipelotrichaceae.g_Allobaculum.s_                   |                         |              | -4.17        | -4.27        |              |
| p_F.c_E.o_Erysipelotrichales.f_Erysipelotrichaceae.g_Clostridium                      | 2.98                    |              | 3.31         |              |              |
| p_F.c_E.o_Erysipelotrichales.f_Erysipelotrichaceae.g_Clostridium.Other                | 2.99                    |              | 3.42         |              |              |



|                                                                              |       |       |       |
|------------------------------------------------------------------------------|-------|-------|-------|
| p_Proteobacteria                                                             |       | -3.4  | -3.28 |
| p_P.c_Deltaproteobacteria                                                    |       | -3.39 | -3.29 |
| p_P.c_D.o_Desulfovibrionales                                                 |       | -3.39 | -3.3  |
| p_P.c_D.o_Desulfovibrionales.f_Desulfovibrionaceae                           |       | -3.39 | -3.31 |
| p_P.c_D.o_Desulfovibrionales.f_Desulfovibrionaceae.g_Desulfovibrio           |       | -3.39 | -3.28 |
| p_P.c_D.o_Desulfovibrionales.f_Desulfovibrionaceae.g_Desulfovibrio.s_C21_c20 |       | -3.39 | -3.28 |
| p_Tenericutes                                                                |       | -3.19 | -3.52 |
| p_T.c_Mollicutes                                                             |       | -3.19 | -3.50 |
| p_T.c_M.o_RF39                                                               | -3.04 | -3.61 |       |
| p_T.c_M.o_RF39.f_                                                            | -3.04 | -3.61 |       |
| p_T.c_M.o_RF39.f.g_                                                          | -3.04 | -3.61 |       |
| p_T.c_M.o_RF39.f.g.s_                                                        | -3.04 | -3.61 |       |

\*Criteria for inclusion of taxa in Table: significantly affected (LEfSe) at  $\geq$  two time points but never in opposite direction at any other time point; Numbers in grey shading represent those taxa up in infected; no shading represents those down in infected. **bold**; taxa affected at three time points;

**Table S7. Fecal taxa affected by *H. pylori* presence, to species level, related to Figure 6 and Figure S6.<sup>a</sup>**

|   |                       | Log LDA scores by month and Cohort |              |       |              |              |              |       |   |              |   |              |       |
|---|-----------------------|------------------------------------|--------------|-------|--------------|--------------|--------------|-------|---|--------------|---|--------------|-------|
|   |                       | Month                              |              | 1     |              | 2            |              | 3     |   | 4.5          |   | 6            |       |
| A | Cohort                | 1                                  | 2            | 1     | 2            | 1            | 2            | 1     | 2 | 1            | 2 | 1            | 2     |
|   | p_Bacteroidetes       | -4.70                              |              |       |              |              |              |       |   |              |   |              |       |
|   | c_Bacteroidia         | -4.70                              |              |       |              |              |              |       |   |              |   |              |       |
|   | o_Bacteroidales       | -4.70                              |              |       |              |              |              |       |   |              |   |              |       |
|   | f_Bacteroidaceae      | 3.74                               | 4.39         | 4.00  | 4.12         |              |              |       |   | 3.82         |   |              |       |
|   | g_Bacteroides         | 3.72                               | 4.40         | 4.00  | 4.12         |              |              |       |   | 3.82         |   |              |       |
| 1 | <b>s_ovatus</b>       |                                    |              |       |              |              |              | -3.43 |   | -3.33        |   |              | -3.83 |
|   | p_Firmicutes          | 4.68                               |              |       |              |              |              |       |   |              |   |              |       |
|   | c_Bacilli             | 4.20                               |              | -4.23 |              |              |              |       |   | -4.71        |   |              |       |
|   | o_Turicibacteriales   | 3.84                               | 3.44         |       | -3.35        | -4.14        | -3-23        |       |   |              |   | -4.62        | -4.08 |
|   | f_Turicibacteraceae   | 3.84                               | 3.24         |       | -3.37        | -4.14        | -3-23        |       |   |              |   | -4.62        | -4.08 |
|   | g_Turicibacter        | 3.84                               | 3.43         |       | -3.39        | -4.14        | -3-23        |       |   |              |   | -4.62        | -4.06 |
| 2 | <b>s_Turicibacter</b> | <b>3.84</b>                        | <b>3.42</b>  |       | <b>-3.39</b> | <b>-4.14</b> | <b>-3-23</b> |       |   |              |   | <b>-4.62</b> | -4.07 |
|   | c_Clostridia          |                                    |              |       |              |              |              |       |   | 4.45         |   |              | -4.54 |
|   | o_Clostridiales       |                                    |              |       |              |              |              |       |   | 4.44         |   |              | -4.56 |
|   | f_Clostridiales       | 3.53                               | -3.57        |       |              |              |              | -3.52 |   |              |   |              | -4.00 |
|   | g_SMB53               |                                    | -2.64        |       | -3.01        |              |              | -3.52 |   | -3.70        |   |              |       |
| 1 | <b>s_SMB53</b>        |                                    | <b>-2.68</b> |       | <b>-2.95</b> |              |              |       |   | <b>-3.76</b> |   |              |       |

<sup>A</sup>Criteria for inclusion of species in Table: (1) significantly (LEfSe) up or down at three time points in one Cohort and not in the opposite direction in the other cohort; (2) shared between cohorts, same direction at specific time point, not affected in opposite direction; and affected in one cohort in the same direction in  $\geq$  one other time point; numbers in grey shading represent those taxa up in infected; no shading represents those down in infected. **bold**; species level

**Supplemental File 1 (Table). Regulation of 547 immunological genes present in the nCounter GX Mouse Immunology Panel (NanoString, Seattle,WA), related to Figure 3 and Table 1.**

## SUPPLEMENTAL REFERENCES

- Blankenberg, D., Von Kuster, G., Coraor, N., Ananda, G., Lazarus, R., Mangan, M., Nekrutenko, A., and Taylor, J. (2010). Galaxy: a web-based genome analysis tool for experimentalists. *Curr Protoc Mol Biol Chapter 19*, Unit 19 10 11-21.
- Blaser, M.J., Perez-Perez, G.I., Kleanthous, H., Cover, T.L., Peek, R.M., Chyou, P.H., Stemmermann, G.N., and Nomura, A. (1995). Infection with *Helicobacter pylori* strains possessing CagA is associated with an increased risk of developing adenocarcinoma of the stomach. *Cancer Res* 55, 2111-2115.
- Caporaso, J.G., Kuczynski, J., Stombaugh, J., Bittinger, K., Bushman, F.D., Costello, E.K., Fierer, N., Pena, A.G., Goodrich, J.K., Gordon, J.I., *et al.* (2010). QIIME allows analysis of high-throughput community sequencing data. *Nat Methods* 7, 335-336.
- Giardine, B., Riemer, C., Hardison, R.C., Burhans, R., Elnitski, L., Shah, P., Zhang, Y., Blankenberg, D., Albert, I., Taylor, J., *et al.* (2005). Galaxy: a platform for interactive large-scale genome analysis. *Genome Res* 15, 1451-1455.
- Goecks, J., Nekrutenko, A., and Taylor, J. (2010). Galaxy: a comprehensive approach for supporting accessible, reproducible, and transparent computational research in the life sciences. *Genome Biol* 11, R86.
- Jenks, P.J., Megraud, F., and Labigne, A. (1998). Clinical outcome after infection with *Helicobacter pylori* does not appear to be reliably predicted by the presence of any of the genes of the *cag* pathogenicity island. *Gut* 43, 752-758.
- Lu, J.J., Perng, C.L., Shyu, R.Y., Chen, C.H., Lou, Q., Chong, S.K., and Lee, C.H. (1999). Comparison of five PCR methods for detection of *Helicobacter pylori* DNA in gastric tissues. *J Clin Microbiol* 37, 772-774.
- Mainguet, P., Jouret, A., and Haot, J. (1993). [The "Sidney System", a new classification of gastritis]. *Gastroenterol Clin Biol* 17, T13-17.
- Pohl, M.A., Kienesberger, S., and Blaser, M.J. (2012). Novel functions for glycosyltransferases Jhp0562 and GalT in Lewis antigen synthesis and variation in *Helicobacter pylori*. *Infect Immun* 80, 1593-1605.
- Segata, N., Izard, J., Waldron, L., Gevers, D., Miropolsky, L., Garrett, W.S., and Huttenhower, C. (2011). Metagenomic biomarker discovery and explanation. *Genome Biol* 12, R60.
